# Supplementary material for: Transcriptome and Metabolome Reveal Salt-Stress Responses of Leaf Tissues from Dendrobium officinale
Source: MDPI journal article supplement (doi:10.3390/biom11050736), 2021-05-15
Supplement: s1 [file s1]

Table S3 The result of the protein (Gene9655) sequence being blasted to the Plant Transcription Factor Database.

Query: DoMYC2(XP\_020675326.1)

| Hit ID      | Description                                                       | Score | E-Value |
|-------------|-------------------------------------------------------------------|-------|---------|
| AT4G17880.1 | Arabidopsis thaliana bHLH family protein                          | 438   | 4e-49   |
| AT1G32640.1 | Arabidopsis thaliana bHLH family protein                          | 436   | 1e-48   |
| AT5G46760.1 | Arabidopsis thaliana bHLH family protein                          | 384   | 1e-41   |
| AT4G16430.1 | Arabidopsis thaliana bHLH family protein                          | 344   | 1e-36   |
| AT4G00870.1 | Arabidopsis thaliana bHLH family protein                          | 322   | 7e-34   |
| AT5G46830.1 | Arabidopsis thaliana NACL-inducible gene 1                        | 318   | 7e-33   |
| AT2G46510.1 | Arabidopsis thaliana ABA-inducible BHLH-type transcription factor | 283   | 4e-28   |
| AT1G01260.1 | Arabidopsis thaliana bHLH family protein                          | 261   | 3e-25   |
| AT1G01260.3 | Arabidopsis thaliana bHLH family protein                          | 261   | 3e-25   |
| AT1G01260.2 | Arabidopsis thaliana bHLH family protein                          | 261   | 3e-25   |
| AT4G09820.1 | Arabidopsis thaliana bHLH family protein                          | 198   | 2e-17   |
| AT4G00480.2 | Arabidopsis thaliana bHLH family protein                          | 173   | 3e-14   |
| AT4G00480.1 | Arabidopsis thaliana bHLH family protein                          | 172   | 3e-14   |
| AT5G41315.1 | Arabidopsis thaliana bHLH family protein                          | 172   | 3e-14   |
| AT1G63650.1 | Arabidopsis thaliana bHLH family protein                          | 172   | 4e-14   |
| AT1G63650.2 | Arabidopsis thaliana bHLH family protein                          | 172   | 4e-14   |
| AT1G63650.3 | Arabidopsis thaliana bHLH family protein                          | 172   | 4e-14   |
| AT4G37850.1 | Arabidopsis thaliana bHLH family protein                          | 158   | 8e-13   |
