# Supplementary material for: Transcriptome and Metabolome Reveal Salt-Stress Responses of Leaf Tissues from Dendrobium officinale
Source: MDPI journal article supplement (doi:10.3390/biom11050736), 2021-05-15
Supplement: s1 [file s1]

**Table S2** Number and quality of RNA-seq reads produced in each sample. Sample 1, Sample 2, and Sample 3 indicate three biological replicates.

| Sample        | Total Reads<br>(M) | Total Clean<br>Reads (M) | Total Clean<br>Bases (Gb) | GC Content<br>(%) | Clean Reads $\geq$<br>Q30 (%) | Mapped Reads (%) |
|---------------|--------------------|--------------------------|---------------------------|-------------------|-------------------------------|------------------|
| Sample_1_0 h  | 58.80              | 29.40                    | 8.78                      | 48.78             | 93.61                         | 91.27            |
| Sample_2_0 h  | 41.21              | 20.61                    | 6.17                      | 48.47             | 93.59                         | 91.17            |
| Sample_3_0 h  | 46.88              | 23.44                    | 7.00                      | 48.40             | 93.69                         | 91.29            |
| Sample_1_4 h  | 63.03              | 31.51                    | 9.40                      | 48.47             | 93.50                         | 91.08            |
| Sample_2_4 h  | 42.45              | 21.23                    | 6.33                      | 48.45             | 93.51                         | 91.04            |
| Sample_3_4 h  | 53.02              | 26.51                    | 7.91                      | 48.34             | 93.85                         | 91.08            |
| Sample_1_12 h | 52.98              | 26.49                    | 7.90                      | 47.84             | 93.27                         | 91.07            |
| Sample_2_12 h | 54.71              | 27.35                    | 8.15                      | 47.67             | 93.75                         | 91.52            |
| Sample_3_12 h | 41.07              | 20.54                    | 6.14                      | 47.50             | 93.80                         | 91.36            |
