# Supplementary material for: Transcriptome and Metabolome Reveal Salt-Stress Responses of Leaf Tissues from Dendrobium officinale
Source: MDPI journal article supplement (doi:10.3390/biom11050736), 2021-05-15
Supplement: s1 [file s1]

**Table S1** Primer sequences used in qRT-PCR.

| Primer name | Sequence (5' to 3')     |
|-------------|-------------------------|
| Actin-F     | TCCCAAGGCAAACAGAGAAA    |
| Actin-R     | GGCCACTAGCATATAGGGAAAG  |
| DoANS-F     | CTCCTTACTCTCTCTCGGTCTC  |
| DoANS-R     | CAGCGTGGGTAGTAGTTGATTT  |
| DoAOC-F     | CCTAAGCCAGAAGGAAGTCAAT  |
| DoAOC-R     | CTGTTATTCCGAGCCTCTTCTC  |
| DoAOS-F     | GTTCCGAAGCTCGTTGAAGA    |
| DoAOS-R     | TCCAGCCGTGTTGAAGTAATC   |
| DoCHI-F     | CGTCTACACCGAAGAAGAAGAAG |
| DoCHI-R     | GGAATGAGAGAAGACGATGGAAG |
| DoF3'5'H-F  | GGGCTTCATCTCTGACCTATTC  |
| DoF3'5'H-R  | GTCGGAGGATTGATGGGTTT    |
| DoLOX2S-F   | AGATTCCGGAGATGATGGAAAG  |
| DoLOX2S-R   | CAGCTGGATACTGAGAGGATTG  |
| DoMFP-F     | AAGTTGGAGGATGCGTATGG    |
| DoMFP-R     | GCTTGCGAGAGAGATGAATTTG  |
| DoOPR-F     | TCCTCTCACATCGGGTAGTT    |
| DoOPR-R     | GTCAGTGGCTCTTTGGGTATAG  |
