# Supplementary material for: Transcriptome and Metabolome Reveal Salt-Stress Responses of Leaf Tissues from Dendrobium officinale
Source: MDPI journal article supplement (doi:10.3390/biom11050736), 2021-05-15
Supplement: s1 [file s1]

Table S4 The result of the protein (Gene6015) sequence being blasted to the Plant Transcription Factor Database.

Query: DoMYB114-XP\_020672817.1

| Hit ID      | Description                                             | Score | E-Value |
|-------------|---------------------------------------------------------|-------|---------|
| AT5G35550.1 | Arabidopsis thaliana MYB family protein                 | 453   | 7e-57   |
| AT4G38620.1 | Arabidopsis thaliana myb domain protein 4               | 452   | 2e-56   |
| AT1G22640.1 | Arabidopsis thaliana myb domain protein 3               | 449   | 3e-56   |
| AT2G16720.1 | Arabidopsis thaliana myb domain protein 7               | 435   | 5e-54   |
| AT4G34990.1 | Arabidopsis thaliana myb domain protein 32              | 430   | 4e-53   |
| AT5G14750.1 | Arabidopsis thaliana myb domain protein 66              | 423   | 5e-53   |
| AT4G09460.1 | Arabidopsis thaliana myb domain protein 6               | 423   | 1e-52   |
| AT3G13540.1 | Arabidopsis thaliana myb domain protein 5               | 424   | 1e-52   |
| AT5G60890.1 | Arabidopsis thaliana myb domain protein 34              | 421   | 1e-51   |
| AT5G40330.1 | Arabidopsis thaliana myb domain protein 23              | 415   | 1e-51   |
| AT1G35515.1 | Arabidopsis thaliana high response to osmotic stress 10 | 406   | 3e-50   |
| AT3G23250.1 | Arabidopsis thaliana myb domain protein 15              | 409   | 5e-50   |
| AT5G26660.1 | Arabidopsis thaliana myb domain protein 86              | 414   | 6e-50   |
| AT5G61420.2 | Arabidopsis thaliana myb domain protein 28              | 415   | 6e-50   |
| AT5G16770.2 | Arabidopsis thaliana myb domain protein 9               | 412   | 9e-50   |
| AT5G16770.1 | Arabidopsis thaliana myb domain protein 9               | 412   | 9e-50   |
| AT5G52600.1 | Arabidopsis thaliana myb domain protein 82              | 400   | 1e-49   |
| AT5G07690.1 | Arabidopsis thaliana myb domain protein 29              | 411   | 1e-49   |
| AT4G05100.1 | Arabidopsis thaliana myb domain protein 74              | 409   | 2e-49   |
| AT4G28110.1 | Arabidopsis thaliana myb domain protein 41              | 404   | 3e-49   |
| AT4G01680.3 | Arabidopsis thaliana myb domain protein 55              | 401   | 3e-49   |
| AT3G02940.1 | Arabidopsis thaliana myb domain protein 107             | 405   | 7e-49   |
