# Supplementary material for: Transcriptome and Metabolome Reveal Salt-Stress Responses of Leaf Tissues from Dendrobium officinale
Source: Biomolecules. 2021 May 15;11(5):736. doi: 10.3390/biom11050736 (PMC8156352; doi:10.3390/biom11050736)
Supplement: Supplementary file 1 [file biomolecules-11-00736-s001.zip › Table S5.xlsx]

## Sheet: Sheet1
Table S5 Major metabolites detected by using MRM (Multiple Reaction Monitoring) based on novogene in-house database. Fold change (FC) represents ratio of level in treatment to control. P-values were calculated by univariate analysis (t-test).
ID	Name	Class	FC	P-value
Com_232_pos	Kaempferol-ferulyglucosyl-xylosylrhamnoside	Flavonoids	53.0145	4.35e-06
Com_628_pos	Eriodictiol 6-C-hexoside 8-C-hexoside-O-hexoside	Flavone C-glycosides	26.5177	0.00793272
Com_318_pos	Rutin	Flavonoids	15.9525	0.00156942
Com_336_pos	Apigenin C-pentoside	Flavonoids	14.8633	0.081421
Com_597_pos	Quercetin 3-D-galactoside	Flavonoids	9.6939	0.000209867
Com_388_pos	Genistein	Isoflavonoids	8.37289	0.0155869
Com_509_pos	C-hexosyl-luteolin O-hexoside	Flavonoids	7.55487	0.014705
Com_524_pos	4'-O-β-Glucopyranosyl-5-O-methylvisamminol	Flavonoids	6.73427	0.042816
Com_396_pos	Pectolinarigenin	Flavonoids	6.00191	0.00169807
Com_599_pos	Quercetin	Flavonoids	5.72753	0.00116044
Com_525_pos	Daidzein	Isoflavonoids	5.3349	0.00253163
Com_408_pos	Tricin O-sinapoylpentoside	Flavonoids	4.3867	0.0548863
Com_234_pos	Denin	Flavonoids	4.18926	0.0197761
Com_32_neg	Plantagoside	Flavonoids	4.16251	0.0142412
Com_625_pos	B Epimedin	Flavonoids	4.09311	0.00809702
Com_506_pos	C-hexosyl-apigenin O-hexosyl-O-hexoside	Flavonoids	3.51253	0.00711229
Com_596_pos	Quercetin O-malonylhexoside	Flavonoids	3.20294	0.02421
Com_632_pos	Luteolin O-malonylhexoside	Flavonoids	3.18503	0.000346744
Com_327_pos	Nobiletin	Flavonoids	3.183	0.0050816
Com_412_pos	Sinensetin	Flavonoids	3.11652	0.000635395
Com_235_pos	di-C,C-hexosyl-apigenin derivative	Flavonoids	3.04818	0.0377424
Com_598_pos	Quercetin-3,4'-O-di-beta-glucopyranoside	Flavonoids	2.96835	0.0773775
Com_380_pos	Biochanin A 7-O-beta-D-glucoside	Flavonoids	2.74782	0.0289085
Com_428_pos	Chrysin O-malonylhexoside	Flavonoids	2.71074	0.0118524
Com_259_pos	Prim-O-glucosylcimifugin	Flavonoids	2.70594	0.0851537
Com_562_pos	Vitexin	Flavonoids	2.62972	0.0450726
Com_230_pos	Kaempferol-3-gentiobioside	Flavonoids	2.54887	0.00583881
Com_12_neg	Narirutin	Flavonoids	2.36088	0.0183392
Com_331_pos	Apigenin O-malonylhexoside	Flavonoids	2.19795	0.138437
Com_44_neg	Chrysoeriol O-acetylhexoside	Flavone	2.03225	0.00480604
Com_72_neg	Amentoflavone	Flavonoids	1.9177	0.000159491
Com_549_pos	Glycitin	Isoflavonoids	1.91216	0.337117
Com_299_pos	Limocitrin O-hexoside	Flavonoids	1.77307	0.0879105
Com_27_neg	Methylophiopogonanone A	Flavonoids	1.76576	0.0170287
Com_350_pos	Oroxin B	Flavonoids	1.76494	0.0673233
Com_91_neg	Myricitrin	Flavonoids	1.74075	0.0239503
Com_508_pos	C-hexosyl-chrysoeriol O-caffeoylhexoside	Flavonoids	1.64217	0.316134
Com_656_pos	Camelliaside A	Flavonoids	1.61294	0.505438
Com_20_neg	Dihydromyricetin	Flavonol	1.57149	0.079663
Com_505_pos	C-hexosyl-apigenin O-feruloylhexoside	Flavonoids	1.55692	0.171185
Com_81_neg	Tricetin	Flavone	1.55165	0.216143
Com_11_neg	Naringin	Flavonoids	1.46364	0.247584
Com_104_neg	Tiliroside	Flavonoids	1.44719	0.0195
Com_35_neg	Ononin	Isoflavonoids	1.42014	0.193737
Com_370_pos	Syringetin 5-O-hexoside	Flavone	1.41771	0.145913
Com_101_neg	Lonicerin	Flavonoids	1.37876	0.109492
Com_397_pos	Tricin di-O-hexoside	Flavone	1.36266	0.830951
Com_131_neg	Silymarin	Flavonoids	1.35792	0.432094
Com_292_pos	Chrysoeriol C-hexoside	Flavonoids	1.29189	0.562566
Com_633_pos	Luteolin C-sinapoylhexoside	Flavonoids	1.29166	0.918327
Com_619_pos	Bavachinin A	Flavonoids	1.28815	0.544615
Com_15_neg	Homoeriodictyol	Flavanone	1.23893	0.573018
Com_526_pos	Daidzin	Isoflavonoids	1.23859	0.382851
Com_67_neg	Laricitrin	Flavonol	1.2134	0.473892
Com_190_neg	Tricin O-saccharic acid	Flavone	1.18242	0.428262
Com_236_pos	di-C,C-hexosyl-methylluteolin	Flavonoids	1.17995	0.205235
Com_629_pos	(-)-Catechin Gallate	Catechin derivatives	1.1374	0.528143
Com_69_neg	Isorhamnetin-3-O-neohespeidoside	Flavonoids	1.13426	0.45606
Com_627_pos	Chrysoeriol C-hexosyl-O-rhamnoside	Flavone C-glycosides	1.08745	0.858629
Com_647_pos	Catechin	Flavonoids	1.07579	0.837121
Com_191_neg	Tricin O-eudesmic acid	Flavone	1.06533	0.534243
Com_51_neg	Scutellarein	Flavonoids	1.05875	0.490911
Com_507_pos	C-hexosyl-apigenin O-p-coumaroylhexoside	Flavonoids	1.04654	0.754666
Com_49_neg	Acacetin	Flavonoids	1.03237	0.955053
Com_156_neg	Trifolirhizin +HCOOH	Flavonoids	0.955872	0.784462
Com_335_pos	Apigeninidin 5-glucoside	Flavonoids	0.934852	0.641444
Com_497_pos	Naringenin O-malonylhexoside	Flavonoids	0.902113	0.839731
Com_572_pos	methylQuercetin O-hexoside	Flavonoids	0.868378	0.086688
Com_645_pos	Chalcone	Flavonoids	0.861768	0.601777
Com_291_pos	Chrysoeriol 7-O-rutinoside	Flavonoids	0.84851	0.716698
Com_504_pos	Narcissoside	Flavonoids	0.830966	0.347458
Com_241_pos	6-Formyl-isoophiopogonanone A	Flavonoids	0.830632	0.0513479
Com_514_pos	Kaempferol-3-O-rutinoside	Flavonoids	0.823981	0.476618
Com_68_neg	Isoschaftoside	Flavonoids	0.815622	0.286918
Com_194_neg	Methylhesperidin	Flavonoids	0.786467	0.0806212
Com_365_pos	Isomucronulatol	Isoflavonoids	0.767821	0.533561
Com_187_neg	Spinosin	Flavonoids	0.75668	0.307808
Com_337_pos	Isovitexin	Flavonoids	0.731134	0.174805
Com_193_neg	Phloridzin	Flavonoids	0.730976	0.310521
Com_153_neg	Afzelechin	Flavanone	0.696181	0.0807349
Com_285_pos	Sophoricoside	Flavonoids	0.696058	0.342228
Com_92_neg	Dihydrokaempferol	Flavonoids	0.691412	0.0337724
Com_546_pos	Tricin 4'-O-(β-guaiacylglyceryl) ether 5-O-hexoside	Flavonoids	0.557825	0.55547
Com_126_neg	Diosmin	Flavonoids	0.527946	0.0378523
Com_238_pos	di-C,C-hexosyl-apigenin	Flavonoids	0.517017	0.0438145
Com_493_pos	Schaftoside	Flavonoids	0.495956	0.0760801
Com_155_neg	Glucosylvitexin	Flavonoids	0.443706	0.0133672
Com_571_pos	C-pentosyl-C-hexosyl-apigenin	Flavonoids	0.4429	0.0992558
Com_134_neg	Apigenin 4-O-rhamnoside	Flavonoids	0.442326	0.0664427
Com_150_neg	Rhoifolin	Flavonoids	0.411481	0.0262975
Com_10_neg	Apigenin-6,8-di-C-glycoside	Flavonoids	0.411312	0.00995469
Com_63_neg	Vitexin-2-O-rhamnoside	Flavonoids	0.361435	0.0134193
Com_135_neg	Apigenin-7-glucoside	Flavonoids	0.300615	0.00489974
Com_136_neg	Apigenin 5-O-glucoside	Flavonoids	0.263151	0.000901206
Com_472_pos	di-C,C-pentosyl-luteolin	Flavonoids	0.0908947	0.00102971
Com_264_pos	beta-Nicotyrine	Alkaloids	21.7015	0.0015276
Com_275_pos	(+)-Tetrandrine	Alkaloids	17.1606	0.010552
Com_554_pos	Canadine	Alkaloids	4.20113	0.00472244
Com_662_pos	Dendrobine	Alkaloids	3.51565	0.0699218
Com_649_pos	(S)-Canadine	Alkaloids and derivatives	3.11211	0.0397531
Com_387_pos	Acetyl hydroxy tomatidine-O-hexoside	glycoalkaloid	2.70408	0.0352418
Com_297_pos	Mesaconitine	Alkaloids	2.36621	0.127741
Com_128_neg	Crotonoside	Alkaloids	2.26565	0.0178065
Com_226_pos	Corydaline	Alkaloids	2.02223	0.168411
Com_612_pos	4beta-Hydroxy-11-O-(2'-pyrolylcarboxy)epilupinine	Alkaloids	1.82343	0.0524521
Com_655_pos	Matrine	Alkaloids	1.78533	0.202117
Com_642_pos	Scopolamine	Alkaloids	1.71076	0.0169584
Com_636_pos	Imperialine	Alkaloids	1.6585	0.373096
Com_418_pos	Harmine	Alkaloids and derivatives	1.56553	0.0649428
Com_373_pos	(S)-Tetrahydrocolumbamine	Alkaloids	1.34989	0.233721
Com_646_pos	Catharanthine	Alkaloids	1.30945	0.38575
Com_437_pos	Leonurine	Alkaloids	1.30386	0.932926
Com_348_pos	Palmatrubine	Alkaloids	1.23832	0.748954
Com_277_pos	Stachydrine	Alkaloids	1.11977	0.423587
Com_577_pos	L-Abrine	Alkaloids	1.11305	0.576246
Com_252_pos	Nuciferin	Alkaloids	1.10126	0.207613
Com_31_neg	Pyrroloquinoline quinone	Alkaloids	1.10102	0.906253
Com_553_pos	Gramine	Alkaloids	1.06622	0.635977
Com_310_pos	Hydroxytomatidine	glycoalkaloid	1.05896	0.949637
Com_243_pos	1-Deoxynojirimycin	Alkaloids	1.04296	0.832386
Com_399_pos	Swainsonine	Alkaloids	1.03164	0.943209
Com_374_pos	Neotuberostemonine	Alkaloids	1.01787	0.982989
Com_340_pos	Topotecan	Alkaloids	1.00508	0.945711
Com_404_pos	Tryptamine	Alkaloids	0.979229	0.78558
Com_587_pos	Cytisine	Alkaloids and derivatives	0.917589	0.968872
Com_212_pos	Trigonelline	Alkaloids	0.873469	0.401946
Com_400_pos	Betaine	Alkaloids	0.80343	0.321854
Com_548_pos	Levodopa	Alkaloids	0.755339	0.322963
Com_541_pos	Nomilin	Terpenoids	3.07246	0.109289
Com_45_neg	Swertimarin +HCOOH	Terpenoids	2.8529	0.0380825
Com_82_neg	Ptaquiloside	Terpenoids	1.6567	0.324056
Com_262_pos	Polypodine B	Terpene	1.41166	0.0262411
Com_467_pos	Artemisinin	Terpenoids	1.37465	0.13068
Com_268_pos	18-Nor-4,15-dihydroxyabieta-8,11,13-trien-7-one	Terpene	1.36811	0.295261
Com_488_pos	Syringenone	Terpene	1.36726	0.279771
Com_576_pos	Kolavic acid	Terpene	1.34181	0.310235
Com_643_pos	Fraxinellone	Terpenoids	1.32189	0.570169
Com_147_neg	Rehmannioside A	Terpenoids	1.22006	0.234916
Com_442_pos	Diosgenin	Terpene	1.19573	0.0411552
Com_578_pos	Kaurenoic acid	Terpenoids	1.19176	0.960931
Com_439_pos	Levistilide A	Terpenoids	0.998499	0.947583
Com_648_pos	Cantharidin	Terpenoids	0.976561	0.874747
Com_255_pos	Nardosinone	Terpenoids	0.957179	0.133125
Com_406_pos	beta-Carotene	Terpenoids	0.945153	0.0707292
Com_377_pos	Betulonicacid	Terpenoids	0.917457	0.981059
Com_43_neg	Betulinic acid	Terpenoids	0.874674	0.542145
Com_261_pos	Polygodial	Terpene	0.705945	0.39679
Com_231_pos	Ixoside	Terpene	0.616252	0.163118
Com_658_pos	N-Feruloyltyramine	Ployphenol	363.826	0.000109321
Com_413_pos	Sinapoyl O-hexoside	Ployphenol	7.75988	0.00149496
Com_452_pos	N-p-Coumaroylagmatine	Phenolamides	5.04907	0.00263353
Com_393_pos	Phellodenol H	Ployphenol	5.01738	0.00433242
Com_457_pos	3,4-Dihydroxybenzaldehyde	Phenols	4.78696	0.0106986
Com_618_pos	Benzamidine	Ployphenol	3.12827	0.00744097
Com_371_pos	N-Feruloylagmatine	Phenolamides	3.06609	0.00608128
Com_383_pos	Acetaminophen	Phenols	2.52176	0.0115439
Com_394_pos	Phellodenol H O-hexoside	Ployphenol	2.4353	0.00222722
Com_305_pos	Ferulic acid O-hexoside	Ployphenol	2.38772	0.0683288
Com_390_pos	PolygalaxanthoneⅦ	Phenols	1.93173	0.0411256
Com_75_neg	Prunindihydrochalcone	Phenols	1.79564	0.134558
Com_660_pos	N-Feruloylserotonin	Ployphenol	1.78957	0.0560819
Com_152_neg	Coniferin	Phenols	1.70691	0.00404296
Com_214_pos	N', N''-DiFeruloylspermidine	Phenolamides	1.61579	0.0108354
Com_201_pos	Raspberry Ketone	Phenols	1.48386	0.232571
Com_319_pos	N-Sinapoylputrescine	Phenolamides	1.47717	0.146178
Com_668_pos	N-Feruloylspermidine	Phenolamides	1.3999	0.208978
Com_258_pos	Protocatechuic Acid	Phenols And Its Derivatives	1.23724	0.113251
Com_516_pos	Miyabenol C	Phenols	1.21478	0.288851
Com_661_pos	Feruloylputrescine	Phenolamides	1.20665	0.187371
Com_465_pos	(-)-Maackiain	Phenols	1.12278	0.517662
Com_483_pos	Syringin	Phenols	1.09706	0.691872
Com_520_pos	N', N''-p-Coumaroyl, Feruloylspermidine	Phenolamides	1.08513	0.856874
Com_215_pos	N', N''-DiFeruloylagamtine-N-arabinoside	Phenolamides	1.04659	0.297614
Com_106_neg	Orcinol glucosid	Phenols	1.02893	0.457428
Com_564_pos	4-Nitrophenol	Phenols	1.00136	0.957967
Com_557_pos	N', N'', N'''-DiFeruloyl,Sinapoylspermidine	Phenolamides	0.977047	0.797998
Com_286_pos	Spermidine derivative	Phenolamides	0.965401	0.949644
Com_607_pos	6-Gingerol	Phenols	0.961536	0.876219
Com_48_neg	IsochlorogenicacidC	Phenols	0.879324	0.299889
Com_430_pos	Ethyl ferulate	Phenolic acids	0.862427	0.0651087
Com_455_pos	N-Sinapoylagmatine	Phenolamides	0.771572	0.233221
Com_141_neg	8-Gingerol	Phenols	0.755879	0.343923
Com_122_neg	4-Hydroxybenzoic acid	Phenolic acids	0.639701	0.00180417
Com_217_pos	N1,N10-Dicoumaroyl spermidine	Phenolamides	0.583434	0.154519
Com_209_pos	trans-3-Indoleacrylic acid	Organic Acid And Its Derivatives	20.3306	0.00274512
Com_486_pos	L-Tryptophan	Amino Acid And Its Derivatives	20.1938	0.00253092
Com_244_pos	Caffeic Acid	Organic Acid And Its Derivatives	13.6254	0.00128323
Com_325_pos	Sinapic acid	Organic Acid And Its Derivatives	12.2533	0.000186491
Com_424_pos	L-Homoarginine	Amino Acid And Its Derivatives	7.64657	0.0174748
Com_34_neg	D-Xylonic acid	Organic Acid And Its Derivatives	5.73918	0.0017563
Com_229_pos	L-Isoleucine	Amino Acid And Its Derivatives	5.10003	3.84e-05
Com_322_pos	3-Hydroxy-3-Methylpentane-1,5-Dioic Acid	Amino Acid And Its Derivatives	5.02493	0.00329628
Com_227_pos	L-Leucine	Amino Acid And Its Derivatives	4.63745	1.7e-05
Com_40_neg	Isocitrate	Organic Acid And Its Derivatives	4.6032	0.061159
Com_375_pos	N-Coumaroyltyramine	Amino Acid And Its Derivatives	4.23785	0.0213018
Com_324_pos	3-Chloro-L-Tyrosine	Amino Acid And Its Derivatives	4.03328	0.0695674
Com_246_pos	N1-Acetylspermine	Organic Acid And Its Derivatives	3.77609	0.00268611
Com_1_neg	Mevalonic acid	Organic Acid And Its Derivatives	3.56381	0.0101888
Com_667_pos	N-Hydroxy-L-tryptophan	Amino Acid And Its Derivatives	3.18619	0.00865116
Com_491_pos	Indole-3-pyruvate	Organic Acid And Its Derivatives	3.18186	0.0566182
Com_568_pos	L-Phenylalanine	Amino Acid And Its Derivatives	3.14034	0.000970934
Com_615_pos	6-Aminohexanoic acid	Amino Acid And Its Derivatives	3.01243	0.0181116
Com_5_neg	Citric acid	Organic Acid And Its Derivatives	2.91149	0.00223435
Com_594_pos	Xanthurenic acid	Organic Acid And Its Derivatives	2.88147	0.00128569
Com_461_pos	2-Phenylglycine	Amino Acid And Its Derivatives	2.74735	0.0025715
Com_119_neg	3-Phenylpropanoic acid	Organic Acid And Its Derivatives	2.63188	0.0952575
Com_398_pos	Oxidized glutathione	Amino Acid And Its Derivatives	2.48943	0.00758466
Com_197_pos	1-Methylhistidine	Amino Acid And Its Derivatives	2.42028	0.0146975
Com_166_neg	Creatine	Amino Acid And Its Derivatives	2.29202	0.0110911
Com_440_pos	D-Methionine	Amino Acid And Its Derivatives	2.2766	0.000453841
Com_523_pos	D-beta-Homophenylalanine	Amino Acid And Its Derivatives	2.23285	0.00519677
Com_539_pos	2-Hydroxycinnamate	Organic Acid And Its Derivatives	2.22764	0.140455
Com_117_neg	Citraconic Acid	Organic Acid And Its Derivatives	2.13008	0.00088962
Com_189_neg	Allysine	Amino Acid And Its Derivatives	2.06505	0.272674
Com_71_neg	2–furanoic acid	Organic Acid And Its Derivatives	2.04756	0.0133879
Com_36_neg	L-Tartaric acid	Organic Acid And Its Derivatives	2.00363	0.00145645
Com_631_pos	L-Valine	Amino Acid And Its Derivatives	1.98109	0.0185378
Com_94_neg	Aminomalonic acid	Organic Acid And Its Derivatives	1.89906	0.0120495
Com_441_pos	D-Norvaline	Amino Acid And Its Derivatives	1.88839	0.00912151
Com_52_neg	Sebacic acid	Organic Acid And Its Derivatives	1.86994	0.0168432
Com_64_neg	N-Acetylaspartate	Amino Acid And Its Derivatives	1.86324	0.0250947
Com_528_pos	D-(+)-Octopine	Amino Acid And Its Derivatives	1.77656	0.0442237
Com_456_pos	N-Propionylglycine	Amino Acid And Its Derivatives	1.73018	0.283725
Com_180_neg	Homocysteine	Amino Acid And Its Derivatives	1.7112	0.337364
Com_8_neg	L-3-Phenyllactic Acid	Organic Acid And Its Derivatives	1.69458	0.131769
Com_438_pos	L-Cystine	Amino Acid And Its Derivatives	1.67302	0.0213923
Com_161_neg	2-Oxoadipic acid	Organic Acid And Its Derivatives	1.65004	0.100732
Com_522_pos	Phe-Pro	Amino Acid And Its Derivatives	1.64881	0.172254
Com_173_neg	3-Hydroxybutyrate	Organic Acid And Its Derivatives	1.64656	0.151565
Com_88_neg	D-Glutamic acid	Amino Acid And Its Derivatives	1.61412	0.108313
Com_168_neg	Guanidinoethyl Sulfonate	Organic Acid And Its Derivatives	1.60492	0.38889
Com_70_neg	Adipic acid	Organic Acid And Its Derivatives	1.47324	0.0300939
Com_120_neg	Hydroxycitric acid	Organic Acid And Its Derivatives	1.46509	0.0873694
Com_39_neg	L-Saccharopine	Amino Acid And Its Derivatives	1.45775	0.0475013
Com_114_neg	L-Homocitrulline	Amino Acid And Its Derivatives	1.45187	0.144327
Com_303_pos	L-Homocystine	Amino Acid And Its Derivatives	1.43579	0.174173
Com_533_pos	2-Aminoethylphosphonate	Organic Acid And Its Derivatives	1.39636	0.124761
Com_242_pos	Phenylacetylglutamine	Amino Acid And Its Derivatives	1.39619	0.00785393
Com_624_pos	Homovanillic Acid	Organic Acid And Its Derivatives	1.37158	0.301319
Com_314_pos	Phosphocreatine	Amino Acid And Its Derivatives	1.35723	0.2949
Com_604_pos	N-Acetyl-Dl-glutamic acid	Amino Acid And Its Derivatives	1.35604	0.0997272
Com_487_pos	L-Pipecolate	Amino Acid And Its Derivatives	1.34556	0.186064
Com_302_pos	L-Homocarnosine	Amino Acid And Its Derivatives	1.3427	0.504512
Com_90_neg	N-Acetylthreonine	Amino Acid And Its Derivatives	1.3045	0.31275
Com_269_pos	1-Aminocyclopentanecarboxylate	Amino Acid And Its Derivatives	1.29351	0.13987
Com_65_neg	N,N-Dimethylglycine	Amino Acid And Its Derivatives	1.28798	0.0515159
Com_188_neg	L-Argininosuccinate	Organic Acid And Its Derivatives	1.27169	0.3009
Com_600_pos	Pyrrole-2-Carboxylic Acid	Organic Acid And Its Derivatives	1.26832	0.173911
Com_659_pos	Glycyl-L-Leucine	Amino Acid And Its Derivatives	1.25009	0.110223
Com_26_neg	2-Isopropylmalic acid	Organic Acid And Its Derivatives	1.2407	0.0991819
Com_443_pos	Dl-2-Aminooctanoic Acid	Organic Acid And Its Derivatives	1.23934	0.192777
Com_555_pos	DL-Pipecolinic acid	Organic Acid And Its Derivatives	1.23387	0.198254
Com_602_pos	N8-Acetylspermidine	Amino Acid And Its Derivatives	1.23173	0.544628
Com_304_pos	Histamine	Amino Acid And Its Derivatives	1.22573	0.292765
Com_623_pos	Pipecolic acid	Organic Acid And Its Derivatives	1.21345	0.185419
Com_78_neg	Oxaloacetate	Organic Acid And Its Derivatives	1.20432	0.748962
Com_118_neg	Taurine	Amino Acid And Its Derivatives	1.1955	0.279646
Com_25_neg	2-Methylglutaric Acid	Organic Acid And Its Derivatives	1.18912	0.237804
Com_77_neg	Lactic acid	Organic Acid And Its Derivatives	1.18086	0.522371
Com_530_pos	D-2-Aminobutyric acid	Organic Acid And Its Derivatives	1.15854	0.17758
Com_317_pos	S-(5-Adenosy)-L-Homocysteine	Amino Acid And Its Derivatives	1.1541	0.512737
Com_346_pos	D-Glucono-1,5-lactone	Amino Acid And Its Derivatives	1.15264	0.104404
Com_499_pos	β-Alanine	Amino Acid And Its Derivatives	1.1193	0.56795
Com_444_pos	DL-threo-beta-Methylaspartic acid	Amino Acid And Its Derivatives	1.11902	0.695655
Com_503_pos	N-Acetyl-L-Tyrosine	Amino Acid And Its Derivatives	1.10025	0.483296
Com_54_neg	L-Lactic Acid	Organic Acid And Its Derivatives	1.08273	0.951519
Com_500_pos	N-Acetyltryptamine	Amino Acid And Its Derivatives	1.06824	0.481735
Com_283_pos	(-)-N-[3',4'-Dihydroxy-(E)-cinnamoyl]-L-glutamic acid	Amino Acid And Its Derivatives	1.06382	0.281256
Com_172_neg	Succinic anhydride	Organic Acid And Its Derivatives	1.05685	0.847855
Com_502_pos	N-Acetylneuraminic acid	Amino Acid And Its Derivatives	1.05615	0.459729
Com_218_pos	P-Aminohippuric Acid	Organic Acid And Its Derivatives	1.05357	0.834625
Com_288_pos	Cinnamic Acid	Organic Acid And Its Derivatives	1.0425	0.994526
Com_410_pos	L-Methionine sulfone	Amino Acid And Its Derivatives	1.00565	0.905024
Com_38_neg	Suberic acid	Organic Acid And Its Derivatives	1.00552	0.993007
Com_308_pos	N-(2-Hydroxyethyl)iminodiacetic acid	Organic Acid And Its Derivatives	0.955277	0.492549
Com_411_pos	S-Methyl-L-cysteine	Amino Acid And Its Derivatives	0.929908	0.752916
Com_289_pos	Glu-Glu	Amino Acid And Its Derivatives	0.926369	0.67183
Com_320_pos	Nα-Acetyl-L-Arginine	Amino Acid And Its Derivatives	0.895227	0.714919
Com_609_pos	4-Guanidinobutyric acid	Organic Acid And Its Derivatives	0.895093	0.320984
Com_484_pos	L-Serine	Amino Acid And Its Derivatives	0.872531	0.397254
Com_174_neg	3-Dehydroshikimic acid	Organic Acid And Its Derivatives	0.858517	0.153843
Com_148_neg	4-Hydroxy-2-Oxoglutaric Acid	Organic Acid And Its Derivatives	0.853239	0.148985
Com_435_pos	L-Glutamate	Amino Acid And Its Derivatives	0.8243	0.181357
Com_611_pos	4-Acetamidobutyric Acid	Organic Acid And Its Derivatives	0.817096	0.0814759
Com_605_pos	N-Acetyl-L-histidine	Amino Acid And Its Derivatives	0.8065	0.398646
Com_116_neg	N-Acetyl-L-glutamic acid	Amino Acid And Its Derivatives	0.801335	0.191385
Com_521_pos	Phosphoric Acid	Organic Acid And Its Derivatives	0.798299	0.050109
Com_567_pos	1-Aminocyclopropanecarboxylic acid	Amino Acid And Its Derivatives	0.794948	0.0845115
Com_355_pos	Γ-Glutamate-Cysteine	Amino Acid And Its Derivatives	0.753373	0.111144
Com_354_pos	gamma-Aminobutyric acid	Organic Acid And Its Derivatives	0.719766	0.0529413
Com_603_pos	N-Acetyl-L-aaline	Amino Acid And Its Derivatives	0.715036	0.751611
Com_639_pos	Val-Ser	Amino Acid And Its Derivatives	0.713132	0.0638452
Com_620_pos	Azelaic Acid	Organic Acid And Its Derivatives	0.688698	0.232771
Com_250_pos	3-Methylcrotonylglycine	Organic Acid And Its Derivatives	0.657671	0.101265
Com_132_neg	Shikimic acid	Organic Acid And Its Derivatives	0.648631	0.0425044
Com_534_pos	2-Aminoethanethiol	Amino Acid And Its Derivatives	0.637884	0.0399871
Com_247_pos	N6-Acetyl-L-Lysine	Amino Acid And Its Derivatives	0.63628	0.0421988
Com_98_neg	Phosphoenolpyruvic acid	Organic Acid And Its Derivatives	0.627919	0.0207893
Com_429_pos	Threonine	Amino Acid And Its Derivatives	0.621743	0.0687546
Com_426_pos	beta-Nicotinamide adenine dinucleotide phosphate	Organic Acid And Its Derivatives	0.616083	0.305907
Com_485_pos	L-Theanine	Amino Acid And Its Derivatives	0.595537	0.22483
Com_666_pos	NG,NG-Dimethyl-L-arginine	Amino Acid And Its Derivatives	0.592429	0.0363299
Com_301_pos	Histidine	Amino Acid And Its Derivatives	0.588281	0.0250599
Com_550_pos	Reduced glutathione	Amino Acid And Its Derivatives	0.574161	0.0138818
Com_198_pos	2,6-Diaminooimelic Acid	Organic Acid And Its Derivatives	0.571257	0.0204574
Com_581_pos	L-Citrulline	Amino Acid And Its Derivatives	0.557642	0.00301716
Com_282_pos	2-Amino-4-hydroxybutyric acid	Amino Acid And Its Derivatives	0.517568	0.0279579
Com_205_pos	Proline	Amino Acid And Its Derivatives	0.517425	0.00461471
Com_591_pos	Cys-Gly	Amino Acid And Its Derivatives	0.460473	0.0166877
Com_85_neg	5-hydroxyhexanoic acid	Organic Acid And Its Derivatives	0.452545	0.763763
Com_501_pos	N-Acetylputrescine	Amino Acid And Its Derivatives	0.402189	0.0303287
Com_584_pos	D-Proline	Amino Acid And Its Derivatives	0.398018	0.00793831
Com_574_pos	L-Alanine	Amino Acid And Its Derivatives	0.391303	0.00920833
Com_585_pos	D-Glutamine	Amino Acid And Its Derivatives	0.376795	0.00112415
Com_127_neg	2-Hydroxyisocaproic Acid	Organic Acid And Its Derivatives	0.318729	0.0394586
Com_207_pos	trans-3-Hydroxy-L-proline	Amino Acid And Its Derivatives	0.187927	0.00116972
Com_573_pos	L-Asparagine	Amino Acid And Its Derivatives	0.101888	0.000986734
Com_359_pos	L-Ornithine	Amino Acid And Its Derivatives	0.0862927	0.000499177
Com_614_pos	6,7-Dimethoxy-4-Methylcoumarin	Phenylpropanoids	25.1631	0.0104551
Com_181_neg	Purpureaside C	Phenylpropanoids	4.60908	0.000470743
Com_395_pos	p-Coumaraldehyde	Phenylpropanoids	4.08614	0.00971092
Com_531_pos	4-Methylumbelliferone	Phenylpropanoids	4.06746	0.0151142
Com_171_neg	Sibiricose A6	Phenylpropanoids	3.97543	0.0358905
Com_121_neg	Forsythoside B	Phenylpropanoids	3.51371	0.00407165
Com_608_pos	p-Coumaric acid	Phenylpropanoids and polyketides	2.98688	0.0135587
Com_641_pos	Scopoletin	Phenylpropanoids	2.46106	9.75e-05
Com_13_neg	Pinoresinol-glucoside	Phenylpropanoids	2.05529	0.00252724
Com_496_pos	Schisandrin A	Phenylpropanoids	1.82642	0.539599
Com_225_pos	Columbianadin	Phenylpropanoids	1.746	0.115975
Com_293_pos	Cinnamal	Phenylpropanoids and polyketides	1.72273	0.349737
Com_498_pos	Schisantherin B	Phenylpropanoids	1.69878	0.150719
Com_309_pos	Esculetin	Phenylpropanoids	1.54495	0.217624
Com_294_pos	Cinnamaldehyde	Phenylpropanoids and polyketides	1.47161	0.50657
Com_202_pos	Angelicin	Phenylpropanoids and polyketides	1.37153	0.488404
Com_351_pos	Oxypeucedanin hydrate	Phenylpropanoids	1.35994	0.253372
Com_364_pos	Isoeugenol	Phenylpropanoids	1.29006	0.505622
Com_366_pos	Isopimpinellin	Phenylpropanoids and polyketides	1.20589	0.783196
Com_638_pos	Imperatorin	Phenylpropanoids and polyketides	1.0746	0.704426
Com_211_pos	Pterostilbene	Phenylpropanoids	1.07068	0.578212
Com_224_pos	COLUMBIANETIN ACETATE	Phenylpropanoids	1.04744	0.791063
Com_176_neg	Esculin hydrate	Phenylpropanoids	1.04199	0.98145
Com_464_pos	3,4-Dihydrocoumarin	Phenylpropanoids	0.999435	0.957503
Com_552_pos	Gomisin D	Phenylpropanoids	0.992503	0.82842
Com_338_pos	8-hydroxy-6,7-dimethoxycoumarin	Phenylpropanoids	0.984772	0.809616
Com_414_pos	Sinapine	Phenylpropanoids and polyketides	0.584885	0.218997
Com_19_neg	Cellotriose	Carbohydrates	10.5256	0.000506627
Com_6_neg	Raffinose	Carbohydrates	6.89303	0.00886817
Com_651_pos	Maltotriitol	Sugar Alcohols	5.8114	5.05e-05
Com_669_pos	delta-Aminolevulinic acid hydrochloride	Carbohydrates	5.60609	1.25e-05
Com_586_pos	Melezitose	Carbohydrates	4.70363	0.000477645
Com_58_neg	D-Tagatose	Carbohydrates	3.86307	0.000359797
Com_16_neg	Inositol	Carbohydrates	3.75196	0.00430209
Com_158_neg	Trehalose 6-phosphate	Carbohydrates	3.71413	6.63e-05
Com_60_neg	D-Sedoheptulose 7-phosphate	Carbohydrates	3.11122	0.0205887
Com_59_neg	Dulcitol	Carbohydrates	2.95038	0.00133613
Com_140_neg	D-sedoheptulose-1-7-phosphate	Carbohydrates	2.86662	0.00525525
Com_138_neg	D-Fructose 1,6-bisphosphate	Sugar Acids And Its Derivatives	2.848	0.0426487
Com_62_neg	D-Xylulose	Carbohydrates	2.75016	0.0129437
Com_57_neg	D-Mannose 6-phosphate	Carbohydrates	2.6889	0.0161564
Com_73_neg	Ribitol	Sugar Alcohols	2.22943	0.155992
Com_96_neg	D-Glucose 6-phosphate	Carbohydrates	2.20869	0.00463705
Com_2_neg	1,6-Anhydro-β-D-Glucopyranose	Carbohydrates	2.15684	0.0067724
Com_107_neg	D-Fructose 6-phosphate	Carbohydrates	2.00631	0.00981592
Com_22_neg	D-Xylulose 5-phosphate	Carbohydrates	1.9222	0.112174
Com_97_neg	Sucrose	Carbohydrates	1.91775	0.00521716
Com_18_neg	D-Glucose	Carbohydrates	1.78975	0.0978378
Com_178_neg	beta-D-Lactose	Carbohydrates	1.73493	0.0119318
Com_157_neg	Trehalose	Carbohydrates	1.63732	0.0160597
Com_145_neg	Galactinol	Carbohydrates	1.62442	0.000144422
Com_37_neg	L-Arabinose	Carbohydrates	1.54615	0.00113505
Com_80_neg	D-Glucose 1-phosphate	Carbohydrates	1.43373	0.0104493
Com_55_neg	L-Arabitol	Sugar Alcohols	1.40628	0.332346
Com_650_pos	Maltitol	Sugar Alcohols	1.40003	0.11191
Com_164_neg	Glucarate O-Phosphoric acid	Carbohydrates	1.32907	0.18893
Com_61_neg	D-Xylose	Carbohydrates	1.29068	0.415086
Com_582_pos	D-Sorbitol	Sugar Alcohols	1.20936	0.109668
Com_84_neg	2-Deoxyribose 5'-phosphate	Carbohydrates	0.836893	0.496797
Com_270_pos	Sedoheptulose Anhydride	Carbohydrates	0.831145	0.0271061
Com_344_pos	Gentiobiose	Carbohydrates	0.814828	0.104239
Com_142_neg	D-Ribulose 5-phosphate	Carbohydrates	0.813311	0.12515
Com_76_neg	phosphoribosyl pyrophosphate	Sugar Acids And Its Derivatives	0.784738	0.359506
Com_7_neg	Lactobionic acid	Carbohydrates	0.662349	0.00133189
Com_79_neg	Fructose	Carbohydrates	0.661206	0.11613
Com_89_neg	D-Glucuronic acid	Sugar Acids And Its Derivatives	0.628181	0.0831166
Com_527_pos	D-Arabitol	Sugar Alcohols	0.490921	0.0160666
Com_290_pos	D-Glucosamine	Carbohydrates	0.485411	0.0650378
Com_450_pos	Pyridoxamine dihydrochloride	Vitamins	8.1928	0.00615998
Com_480_pos	(R)-Lipoic acid	Vitamins	6.73345	0.0137975
Com_580_pos	Vitamin B2	Vitamins	5.25471	0.0507229
Com_328_pos	Nicotinic Acid	Vitamins	1.99496	0.00525807
Com_492_pos	Vitamin A	Vitamins	1.45085	0.0918776
Com_332_pos	Phylloquinone	Vitamins	1.14596	0.194689
Com_518_pos	Niacinamide	Vitamins	1.06421	0.582644
Com_160_neg	Vitamin D3	Vitamins	0.991656	0.949034
Com_575_pos	L-Ascorbate	Vitamins	0.979768	0.63004
Com_245_pos	Biotin	Vitamins	0.896544	0.240022
Com_447_pos	Pyridoxine	Vitamins	0.840827	0.309085
Com_182_neg	Pyridoxal 5'-Phosphate	Vitamins	0.771269	0.159442
Com_30_neg	Nicotinamide-N-oxide	Vitamins	0.598757	0.0463569
Com_475_pos	Thiamin	Vitamins	0.438377	0.0146417
Com_272_pos	Isotanshinone IIA	Quinones	4.67941	0.000495762
Com_517_pos	Przewaquinone A	Quinones	1.459	0.0295109
Com_566_pos	Nortanshinone	Quinones	1.11022	0.214933
Com_221_pos	Panaxydol	Lipids and lipid-like molecules	6.60926	0.00814093
Com_436_pos	Methyl linoleate	Lipids and lipid-like molecules	4.912	0.00470674
Com_368_pos	alpha-Linolenic acid	Lipids and lipid-like molecules	3.79012	0.00473508
Com_267_pos	1-Linoleoyl-Rac-Glycerol	Lipids and lipid-like molecules	3.74005	2.26e-05
Com_280_pos	(-)-trans-Carveol	Lipids and lipid-like molecules	1.80016	0.148775
Com_195_pos	D-3-Phosphoglyceric acid	Lipids and lipid-like molecules	1.35354	0.00603567
Com_300_pos	Limonin	Lipids and lipid-like molecules	1.29491	0.169115
Com_239_pos	Curcumol	Lipids and lipid-like molecules	1.2687	0.0587826
Com_358_pos	L-Mimosine	Lipids and lipid-like molecules	1.21567	0.549556
Com_621_pos	Aucubin	Lipids and lipid-like molecules	1.04805	0.756567
Com_256_pos	Stigmasterol	Lipids and lipid-like molecules	1.00523	0.921892
Com_315_pos	Oleic acid	Lipids and lipid-like molecules	0.934366	0.80118
Com_434_pos	Cholesterol	Lipids and lipid-like molecules	0.905694	0.264154
Com_296_pos	Methyl arachidonate	Lipids and lipid-like molecules	0.882101	0.26096
Com_228_pos	(-)-Menthone	Lipids and lipid-like molecules	0.720623	0.282454
Com_220_pos	Protopanaxatriol	Lipids and lipid-like molecules	0.29212	0.0220665
Com_402_pos	14,15-Dehydrocrepenynic acid	Fatty acid	6.66656	6.4e-06
Com_382_pos	9-Hydroxy-(10E,12Z,15Z)-octadecatrienoic acid	Fatty acid	5.13279	0.00240471
Com_595_pos	Quinic acid	Fatty acid	2.35982	0.0928806
Com_353_pos	LPC(1-acyl 18:2)	Fatty acid	1.86662	0.0774064
Com_352_pos	LPC(1-acyl 18:3)	Fatty acid	1.54565	0.0194517
Com_361_pos	LPC(1-acyl 16:0)	Fatty acid	1.43816	0.105831
Com_360_pos	LPC(1-acyl 16:1)	Fatty acid	1.35533	0.606953
Com_362_pos	LPC(1-acyl 18:1)	Fatty acid	0.972037	0.747414
Com_115_neg	9,10-EODE	Fatty acid	0.577525	0.324125
Com_363_pos	LPC(1-acyl 16:2)	Fatty acid	0.442522	0.1141
Com_257_pos	Phenethylamine	Polyamine	11.1234	9.42e-05
Com_372_pos	N- Feruloylcadaverine	Polyamine	3.47491	0.0828239
Com_453_pos	N-p-Cinnamoylputrescine	Polyamine	3.42944	0.110211
Com_561_pos	N', N'',N'''-Tri-p-cinnamoylagmatine	Polyamine	3.2603	0.023104
Com_213_pos	N', N''-Dicaffeoylspermidine	Polyamine	1.06288	0.734491
Com_369_pos	Diethanolamine	Polyamine	0.991643	0.919967
Com_454_pos	N-p-Cinnamoylagmatine	Polyamine	0.943285	0.771067
Com_560_pos	N', N'',N'''-Triferuloylagmatine	Polyamine	0.932721	0.281759
Com_559_pos	N', N'', N'''-Di-p-hydroxybenxoyl, feruloylagmatine	Polyamine	0.87853	0.541964
Com_466_pos	N', N''-Caffeoyl, feruloylputrescine	Polyamine	0.870597	0.369868
Com_287_pos	Spermine	Polyamine	0.851505	0.479693
Com_339_pos	Trimethylamine N-Oxide	Polyamine	0.555369	0.0088807
Com_274_pos	Spermidine	Polyamine	0.0363811	0.00103653
Com_463_pos	3,4',5-Trimethoxy-trans-stilbene	Traditional Chinese medicine	2.66383	0.0544419
Com_389_pos	Geissoschizine methyl ether	Traditional Chinese medicine	2.44127	0.0153292
Com_664_pos	Rhodionin	Traditional Chinese medicine	1.98537	0.10484
Com_265_pos	Gomisin F	Traditional Chinese medicine	1.81309	0.083343
Com_222_pos	Cleomiscosin C	Traditional Chinese medicine	1.76715	0.0481369
Com_306_pos	Fargesin	Traditional Chinese medicine	1.76599	0.191463
Com_357_pos	Loratadine	Traditional Chinese medicine	1.61786	0.154118
Com_260_pos	Praeruptorin E	Traditional Chinese medicine	1.43593	0.112003
Com_583_pos	Dracorhodin	Traditional Chinese medicine	1.38709	0.423286
Com_323_pos	3-dihydrocadambine	Traditional Chinese medicine	1.17331	0.370767
Com_313_pos	Strychnine	Traditional Chinese medicine	1.1524	0.249653
Com_9_neg	Kinsenoside	Traditional Chinese medicine	1.1348	0.348465
Com_276_pos	(+)-epipinoresinol-4-O-β-D-glucoside	Traditional Chinese medicine	1.06628	0.650741
Com_334_pos	ANGELOL-K	Traditional Chinese medicine	1.01004	0.971644
Com_204_pos	Alantolactone	Traditional Chinese medicine	0.978366	0.830498
Com_468_pos	Artemtherin +Na	Traditional Chinese medicine	0.946119	0.807983
Com_419_pos	Guan-fu base A	Traditional Chinese medicine	0.884879	0.589955
Com_563_pos	3-O-Caffeoylquinic acid methyl ester	Traditional Chinese medicine	0.825616	0.583975
Com_610_pos	4-Dimethylaminobenzaldehyde	Traditional Chinese medicine	0.719219	0.845322
Com_113_neg	6-Phosphogluconic acid	Organic oxygen compounds	3.70455	0.00461319
Com_139_neg	D-Erythrose 4-phosphate	Organic oxygen compounds	2.44099	0.096277
Com_341_pos	Nicotinate ribonucleoside	Organic oxygen compounds	2.21037	0.00375037
Com_570_pos	Muscone	Organic oxygen compounds	1.24155	0.353435
Com_343_pos	Muramic acid	Organic oxygen compounds	1.15026	0.434678
Com_405_pos	Methional	Organic oxygen compounds	1.01976	0.864784
Com_186_neg	Sucralose	Organic oxygen compounds	0.950614	0.985282
Com_108_neg	5-Phosphoribosyl 1-pyrophosphate	Organic oxygen compounds	0.645552	0.244864
